# Supplementary material for: Assessing Seasonal Effects on Identification of Cultivation Methods of Short–Growth Cycle Brassica chinensis L. Using IRMS and NIRS
Source: MDPI journal article supplement (doi:10.3390/foods13081165), 2024-04-11
Supplement: s1 [file s1]

## Supplementary materials

### S1. The equations of sensitivity (SE), specificity (SP), classification accuracy and area under curve (AUC)

$$SE (\%) = \frac{TP}{TP + FN} \times 100$$

$$SP (\%) = \frac{TN}{TN + FP} \times 100$$

$$Accuracy (\%) = 1 - \frac{FP + FN}{TP + FP + TN + FN} \times 100$$

Where TP: true positive (positive samples correctly classified), TN: true negative (negative sample correctly classified), FP: false positive (positive samples incorrectly classified), FN: false negative (negative samples incorrectly classified).

Area under curve (AUC) is a receiver operating characteristic curve, which is plotted on the vertical axis of sensitivity (true positive rate) and abscissa of false positive rate (1- specificity) according to a series of different dichotomies (cut-off values or determination thresholds). The closer the AUC is to 1.0, the higher the authenticity of the method.

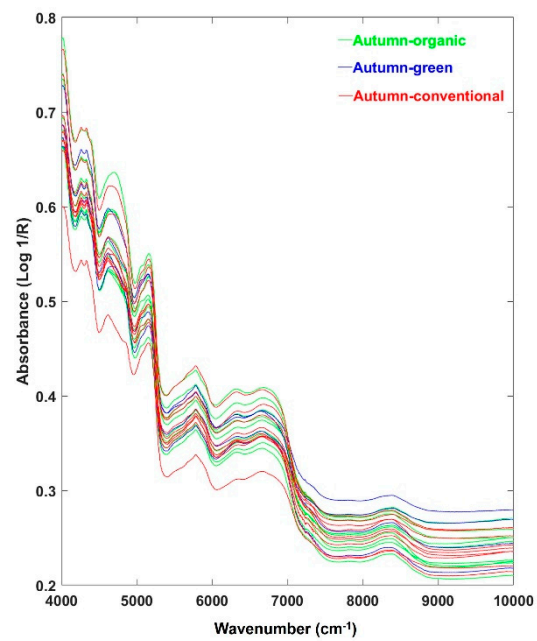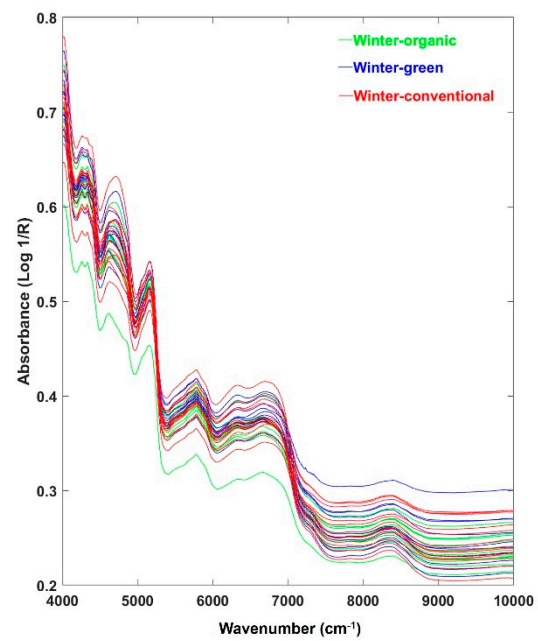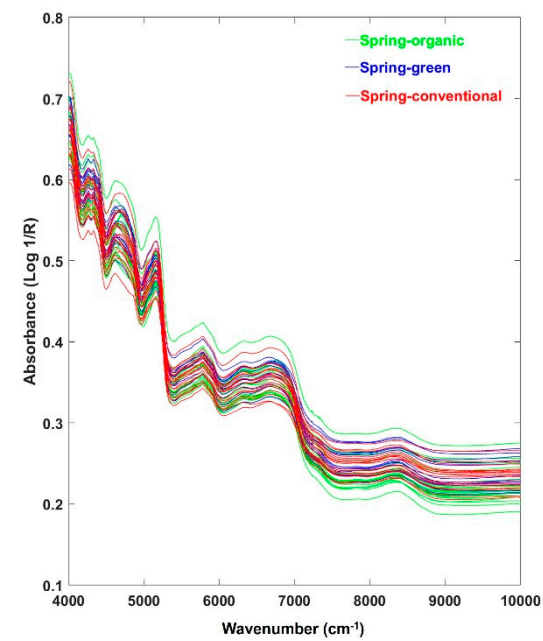

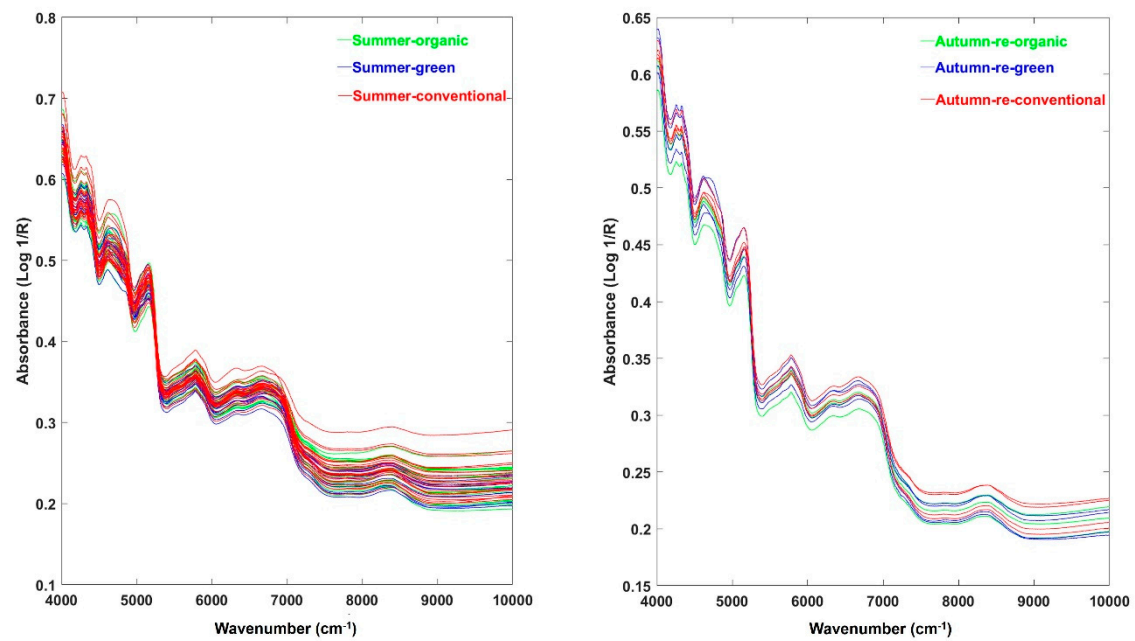

**Figure S1.** BC raw NIR spectra under different seasons

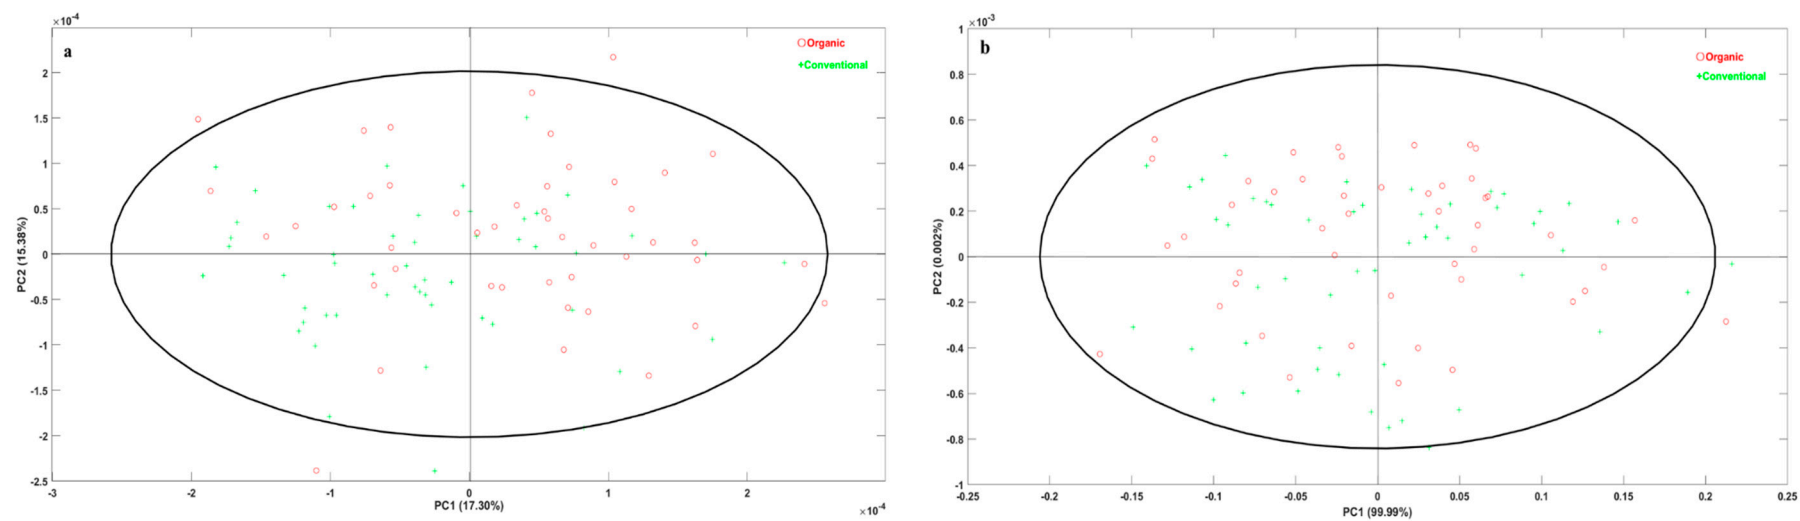

**Figure S2.** The first two principal component score plots of PLS-DA for different *BC* cultivation methods using NIR (a) and IRMS-NIR (b).

**Table S1.** PLS-DA models of BC different cultivation methods using IRMS

| Cultivation methods | CV     | Calibration set |        |        |         |               | Validation set accuracy (%) |
|---------------------|--------|-----------------|--------|--------|---------|---------------|-----------------------------|
|                     | optLVs | Accuracy (%)    | SE (%) | SP (%) | AUC (%) | accuracy (%)  |                             |
| ORG <i>vs.</i> CON  | 2      | 80.45           | 63.64  | 88.89  | 78.68   | 77.55 (76/98) | 75.76 (25/33)               |
| ORG <i>vs.</i> GRE  | 4      | 61.27           | 88.00  | 43.33  | 70.28   | 71.25 (57/80) | 51.85 (14/27)               |
| GRE <i>vs.</i> CON  | 3      | 65.83           | 90.74  | 43.33  | 73.23   | 73.81 (62/84) | 53.57 (15/28)               |

ORG: organic; GRE: green; CON: conventional; OptLVs: the optimal number of latent variables; SE: sensitivity; SP: specificity; AUC: classification error rate and area under curve.

**Table S2.** Comparison of parameters in the NIRS-PLS-DA models with NSD preprocessing method for different BCs cultivation methods.

| Cultivation methods | Models                          | CV        | Calibration set |              |              |              |              | Validation set |
|---------------------|---------------------------------|-----------|-----------------|--------------|--------------|--------------|--------------|----------------|
|                     |                                 | optLVs    | Accuracy (%)    | SE (%)       | SP (%)       | AUC (%)      | Accuracy (%) | Accuracy (%)   |
| ORG <i>vs.</i> CON  | PLS-DA                          | 11        | 81.79           | 85.42        | 90.00        | 87.83        | 87.76        | 78.79          |
|                     | NSD(3,3,1) <sup>a</sup> -PLS-DA | 9         | 76.53           | 86.96        | 88.46        | 87.71        | 87.76        | 63.64          |
|                     | NSD(3,3,2)-PLS-DA               | 10        | 73.47           | 100          | 98.08        | 98.94        | 98.98        | 72.73          |
|                     | NSD(5,5,1)-PLS-DA               | 9         | 78.57           | 89.36        | 90.20        | 89.76        | 89.80        | 69.70          |
|                     | <b>NSD(5,5,2)-PLS-DA</b>        | <b>11</b> | <b>70.41</b>    | <b>91.30</b> | <b>92.31</b> | <b>91.81</b> | <b>91.84</b> | <b>81.82</b>   |
|                     | NSD(7,7,1)-PLS-DA               | 12        | 76.53           | 87.50        | 96.00        | 92.17        | 91.84        | 72.73          |
|                     | NSD(7,7,2)-PLS-DA               | 22        | 69.39           | 100          | 100          | 100          | 100          | 75.76          |
|                     | NSD(9,9,1)-PLS-DA               | 15        | 73.47           | 89.80        | 91.84        | 90.83        | 90.82        | 72.73          |
|                     | NSD(9,9,2)-PLS-DA               | 27        | 69.39           | 100          | 100          | 100          | 100          | 66.67          |
| ORG <i>vs.</i> GRE  | PLS-DA                          | 26        | 50.00           | 100          | 100          | 100          | 100          | 62.96          |
|                     | NSD(3,3,1)-PLS-DA               | 16        | 58.75           | 100          | 100          | 100          | 100          | 59.26          |
|                     | <b>NSD(3,3,2)-PLS-DA</b>        | <b>14</b> | <b>51.25</b>    | 100          | 100          | 100          | 100          | <b>55.56</b>   |
|                     | NSD(5,5,1)-PLS-DA               | 15        | 51.25           | 96.00        | 96.67        | 95.75        | 96.25        | 66.67          |
|                     | NSD(5,5,2)-PLS-DA               | 7         | 46.25           | 91.30        | 70.59        | 83.24        | 82.50        | 66.67          |
|                     | NSD(7,7,1)-PLS-DA               | 24        | 51.25           | 100          | 100          | 100          | 100          | 66.67          |
|                     | NSD(7,7,2)-PLS-DA               | 16        | 56.25           | 95.83        | 90.63        | 93.71        | 93.75        | 59.26          |
|                     | NSD(9,9,1)-PLS-DA               | 24        | 58.75           | 100          | 100          | 100          | 100          | 66.67          |

|                    |                          |           |              |              |              |              |              |              |
|--------------------|--------------------------|-----------|--------------|--------------|--------------|--------------|--------------|--------------|
| GRE <i>vs.</i> CON | NSD(9,9,2)-PLS-DA        | 28        | 58.75        | 100          | 100          | 100          | 100          | 70.37        |
|                    | <b>PLS-DA</b>            | 20        | 53.57        | 100          | 90.91        | 97.22        | 96.43        | 71.43        |
|                    | <b>NSD(3,3,1)-PLS-DA</b> | <b>14</b> | <b>67.86</b> | <b>97.96</b> | <b>94.29</b> | <b>96.53</b> | <b>96.43</b> | <b>57.14</b> |
|                    | NSD(3,3,2)-PLS-DA        | 5         | 64.29        | 86.79        | 80.65        | 83.29        | 57.14        | 57.14        |
|                    | NSD(5,5,1)-PLS-DA        | 19        | 59.52        | 100          | 97.14        | 99.00        | 98.81        | 57.14        |
|                    | NSD(5,5,2)-PLS-DA        | 22        | 57.14        | 100          | 100          | 100          | 100          | 60.71        |
|                    | NSD(7,7,1)-PLS-DA        | 25        | 58.33        | 100          | 100          | 100          | 100          | 60.71        |
|                    | NSD(7,7,2)-PLS-DA        | 10        | 69.05        | 86.00        | 76.47        | 81.55        | 53.57        | 53.57        |
|                    | NSD(9,9,1)-PLS-DA        | 23        | 57.14        | 100          | 100          | 100          | 100          | 67.86        |
|                    | NSD(9,9,2)-PLS-DA        | 16        | 58.37        | 81.25        | 95.83        | 90.66        | 90.00        | 59.37        |

**Table S3.** The  $\delta^{13}\text{C}$ ,  $\delta^{15}\text{N}$ ,  $\delta^2\text{H}$  and  $\delta^{18}\text{O}$  values of different *BC* cultivation methods divided as the calibration and validation sets of the optimal IRMS-NIRS-PLS-DA models

| Combination        | Cultivation method | Variables             | Calibration set |                    |                 |  | Validation set |                   |                 |  |
|--------------------|--------------------|-----------------------|-----------------|--------------------|-----------------|--|----------------|-------------------|-----------------|--|
|                    |                    |                       | No. of samples  | Mean $\pm$ SD      | Range           |  | No. of samples | Mean $\pm$ SD     | Range           |  |
| ORG <i>vs.</i> CON | ORG                | $\delta^{13}\text{C}$ | 46              | -29.05 $\pm$ 1.32  | -31.17— -25.90  |  | 17             | -29.51 $\pm$ 1.44 | -32.09— -26.99  |  |
|                    |                    | $\delta^{15}\text{N}$ |                 | +11.24 $\pm$ 6.17  | -1.28— +24.15   |  |                | +8.50 $\pm$ 6.03  | -1.16— +23.13   |  |
|                    |                    | $\delta^2\text{H}$    |                 | -79.05 $\pm$ 9.32  | -100.52— -58.55 |  |                | -84.28 $\pm$ 9.89 | -101.88— -66.37 |  |
|                    |                    | $\delta^{18}\text{O}$ |                 | +21.51 $\pm$ 2.81  | +15.41— +27.45  |  |                | +21.19 $\pm$ 3.05 | +14.14— +26.53  |  |
|                    | CON                | $\delta^{13}\text{C}$ | 52              | -28.63 $\pm$ 1.54  | -31.73— -25.10  |  | 16             | -29.26 $\pm$ 1.17 | -30.69— -27.44  |  |
|                    |                    | $\delta^{15}\text{N}$ |                 | +4.01 $\pm$ 5.78   | -2.68— +24.44   |  |                | +2.17 $\pm$ 3.19  | -3.20— +9.12    |  |
|                    |                    | $\delta^2\text{H}$    |                 | -79.94 $\pm$ 12.11 | -109.90— -61.93 |  |                | -81.32 $\pm$ 9.55 | -98.57— -68.93  |  |
|                    |                    | $\delta^{18}\text{O}$ |                 | +20.63 $\pm$ 2.39  | +14.26— +25.70  |  |                | +21.06 $\pm$ 1.98 | +17.37— +24.44  |  |
| ORG <i>vs.</i> GRE | ORG                | $\delta^{13}\text{C}$ | 50              | -29.06 $\pm$ 1.40  | -32.09— -25.90  |  | 13             | -29.62 $\pm$ 1.10 | -31.44— -27.99  |  |
|                    |                    | $\delta^{15}\text{N}$ |                 | +9.88 $\pm$ 6.38   | -1.28— +24.15   |  |                | +12.87 $\pm$ 4.98 | +7.14— +20.63   |  |
|                    |                    | $\delta^2\text{H}$    |                 | -80.67 $\pm$ 10.06 | -101.88— -58.55 |  |                | -79.65 $\pm$ 8.38 | -91.84— -69.03  |  |
|                    |                    | $\delta^{18}\text{O}$ |                 | +21.24 $\pm$ 3.04  | +14.14— +27.45  |  |                | +22.12 $\pm$ 1.91 | +18.40— +24.89  |  |
|                    | GRE                | $\delta^{13}\text{C}$ | 30              | -29.07 $\pm$ 1.30  | -31.22— -26.42  |  | 14             | -29.22 $\pm$ 0.79 | -30.18— -27.63  |  |
|                    |                    | $\delta^{15}\text{N}$ |                 | +6.14 $\pm$ 5.32   | -1.33— +19.47   |  |                | +8.01 $\pm$ 4.69  | +0.54— +15.22   |  |
|                    |                    | $\delta^2\text{H}$    |                 | -78.54 $\pm$ 10.76 | -103.83— -59.22 |  |                | -78.75 $\pm$ 6.86 | -89.51— -69.88  |  |



|             |     |                       |    |              |                 |    |             |                |
|-------------|-----|-----------------------|----|--------------|-----------------|----|-------------|----------------|
| GRE vs. CON | GRE | $\delta^{18}\text{O}$ |    | +21.23±2.23  | +17.01—+25.54   |    | +21.68±1.07 | +20.44—+23.33  |
|             |     | $\delta^{13}\text{C}$ | 32 | -29.03±1.28  | -31.22— -26.42  | 12 | -29.36±0.72 | -30.51— -28.24 |
|             |     | $\delta^{15}\text{N}$ |    | +7.18±5.52   | -1.33—+19.47    |    | +5.55±3.97  | +0.72—+13.95   |
|             |     | $\delta^2\text{H}$    |    | -77.60±10.03 | -103.83— -59.22 |    | -81.29±8.12 | -94.02— -70.90 |
|             | CON | $\delta^{18}\text{O}$ |    | +21.47±2.15  | +17.01—+25.54   |    | +21.12±1.22 | +18.92—+23.11  |
|             |     | $\delta^{13}\text{C}$ | 52 | -28.75±1.57  | -31.73— -25.10  | 16 | -28.86±1.16 | -30.69— -27.23 |
|             |     | $\delta^{15}\text{N}$ |    | +4.21±5.81   | -3.20—+24.44    |    | +1.53±2.48  | -1.84—+6.16    |
|             |     | $\delta^2\text{H}$    |    | -80.43±12.29 | -109.90— -61.93 |    | -79.75±8.78 | -92.56— -64.99 |
|             |     | $\delta^{18}\text{O}$ |    | +20.64±2.44  | +14.26—+25.70   |    | +21.04±1.75 | +17.37—+24.44  |

---

ORG: organic; GRE: green; CON: conventional; SD: Standard deviation.

**Table S4.** Comparison of parameters in the IRMS-NIRS-PLS-DA models with NSD preprocessing method for different BCs cultivation methods.

| Combination        | Models                          | CV        | Calibration set |              |              |              |              | Validation set |
|--------------------|---------------------------------|-----------|-----------------|--------------|--------------|--------------|--------------|----------------|
|                    |                                 | optLVs    | Accuracy (%)    | SE (%)       | SP (%)       | AUC (%)      | Accuracy (%) | Accuracy (%)   |
| ORG <i>vs.</i> CON | PLS-DA                          | 12        | 35.71           | 80.43        | 86.54        | 83.71        | 83.67        | 87.88          |
|                    | NSD(3,3,1) <sup>a</sup> -PLS-DA | 12        | 71.43           | 88.37        | 94.55        | 91.96        | 91.84        | 78.79          |
|                    | NSD(3,3,2)-PLS-DA               | 8         | 64.29           | 86.96        | 90.38        | 88.78        | 88.78        | 78.79          |
|                    | NSD(5,5,1)-PLS-DA               | 13        | 73.47           | 86.05        | 94.55        | 91.08        | 90.82        | 78.79          |
|                    | <b>NSD(5,5,2)-PLS-DA</b>        | <b>13</b> | <b>73.47</b>    | <b>89.13</b> | <b>90.38</b> | <b>89.76</b> | <b>89.80</b> | <b>87.88</b>   |
|                    | NSD(7,7,1)-PLS-DA               | 13        | 69.39           | 86.05        | 92.73        | 89.86        | 89.80        | 81.82          |
|                    | NSD(7,7,2)-PLS-DA               | 14        | 67.35           | 86.96        | 90.38        | 88.78        | 88.78        | 78.79          |
|                    | NSD(9,9,1)-PLS-DA               | 12        | 71.43           | 90.70        | 83.64        | 86.62        | 86.73        | 84.85          |
|                    | NSD(9,9,2)-PLS-DA               | 16        | 68.37           | 86.96        | 90.38        | 88.78        | 88.78        | 78.79          |
| ORG <i>vs.</i> GRE | PLS-DA                          | 25        | 51.25           | 97.87        | 100          | 98.53        | 98.75        | 81.48          |
|                    | NSD(3,3,1)-PLS-DA               | <b>10</b> | 52.50           | 86.00        | 73.33        | 80.09        | 81.25        | 88.89          |
|                    | <b>NSD(3,3,2)-PLS-DA</b>        | 16        | <b>48.75</b>    | <b>100</b>   | <b>100</b>   | <b>100</b>   | <b>100</b>   | <b>88.89</b>   |
|                    | NSD(5,5,1)-PLS-DA               | 10        | 48.75           | 84.00        | 66.67        | 76.10        | 77.50        | 85.19          |
|                    | NSD(5,5,2)-PLS-DA               | 15        | 52.50           | 94.00        | 100          | 95.45        | 96.25        | 85.19          |
|                    | NSD(7,7,1)-PLS-DA               | 11        | 55.00           | 84.00        | 66.67        | 76.10        | 77.50        | 81.48          |
|                    | NSD(7,7,2)-PLS-DA               | 9         | 60.00           | 90.00        | 70.00        | 82.05        | 82.50        | 81.48          |
|                    | NSD(9,9,1)-PLS-DA               | 11        | 56.25           | 84.00        | 63.33        | 74.81        | 76.25        | 81.48          |

|                    |                          |           |              |              |              |              |              |              |
|--------------------|--------------------------|-----------|--------------|--------------|--------------|--------------|--------------|--------------|
| GRE <i>vs.</i> CON | NSD(9,9,2)-PLS-DA        | 9         | 55.00        | 88.00        | 66.67        | 79.20        | 80.00        | 85.19        |
|                    | <b>PLS-DA</b>            | <b>20</b> | <b>57.14</b> | <b>96.16</b> | <b>81.25</b> | <b>91.07</b> | <b>90.48</b> | <b>75.00</b> |
|                    | <b>NSD(3,3,1)-PLS-DA</b> | <b>26</b> | <b>63.10</b> | <b>100</b>   | <b>100</b>   | <b>100</b>   | <b>100</b>   | <b>71.43</b> |
|                    | NSD(3,3,2)-PLS-DA        | 11        | 51.19        | 98.11        | 96.77        | 97.44        | 97.62        | 57.14        |
|                    | NSD(5,5,1)-PLS-DA        | 14        | 63.10        | 96.15        | 93.75        | 94.95        | 95.24        | 63.10        |
|                    | NSD(5,5,2)-PLS-DA        | 12        | 58.33        | 90.57        | 83.87        | 87.22        | 88.10        | 58.33        |
|                    | NSD(7,7,1)-PLS-DA        | 14        | 67.86        | 94.34        | 87.10        | 91.30        | 91.67        | 64.29        |
|                    | NSD(7,7,2)-PLS-DA        | 13        | 60.71        | 88.68        | 70.97        | 81.25        | 82.14        | 71.43        |
|                    | NSD(9,9,1)-PLS-DA        | 6         | 67.86        | 87.04        | 66.67        | 78.27        | 79.76        | 64.29        |
|                    | NSD(9,9,2)-PLS-DA        | 11        | 60.71        | 81.13        | 70.97        | 75.72        | 77.38        | 67.86        |

<sup>a</sup> The parameters (s, g, n) in NSD were defined by: s, the number of data in one segment; g, the number of data in one gap; n, 1 or 2 is the first derivative or second derivative.

ORG: organic; GRE: green; CON: conventional; OptLVs: the optimal number of latent variables; SE: sensitivity; SP: specificity; AUC: classification error rate and area under curve.
